# Supplementary material
Source: PubMed Central journal article supplement (PMC2323280)
Supplement: ppat.0040010.sg002.pdf [file ppat.0040010.sg002.pdf]

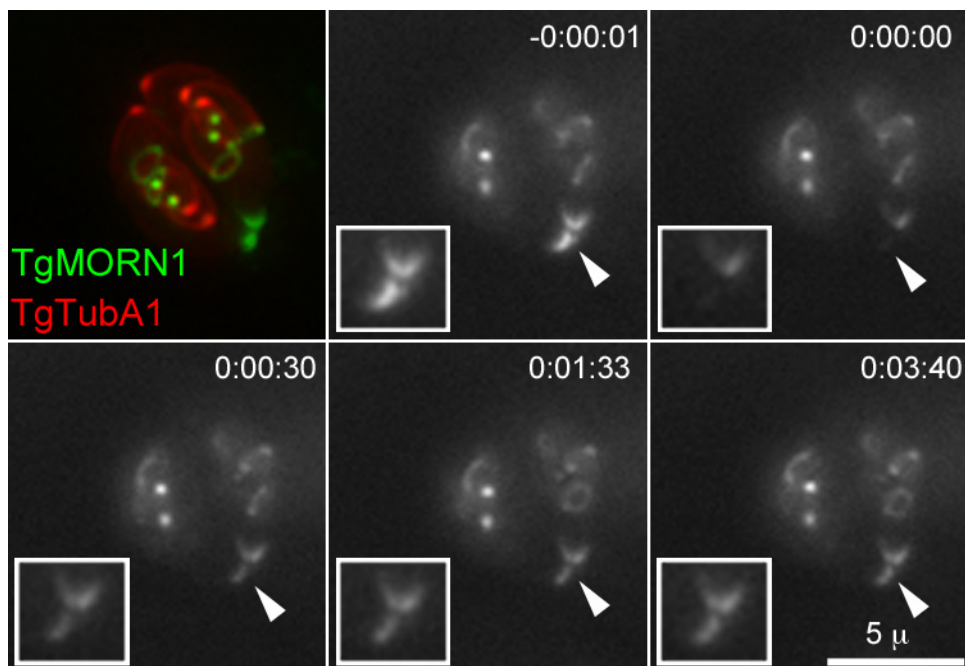

**Figure S2** Protein exchange occurs in the mature basal complex.

Time-lapse experiment tracking the exchange of EGFP-TgMORN1 in the basal complexes of adult parasites using FRAP. The fluorescence of EGFP-TgMORN1 in the mature basal complexes of two dividing parasites was partially bleached (*arrowheads*, insets) at time 0. The recovery started at ~11 sec, but only partially completed over the course of 220 seconds. Insets: 1.5x magnification of regions indicated by the arrowheads. The merged image of EGFP-TgMORN1 (green) and mCherryFP-TgTubA1 (red) is the maximum intensity projection of a deconvolved 3-D stack. All the gray scale images are non-deconvolved single optical planes.
